# Supplementary material for: Metallophilic interactions in stacked dinuclear rhodium 2,2′-biimidazole carbonyl complexes
Source: Royal Society of Chemistry journal article supplement (doi:10.1039/c2ce25385b), 2012-01-01
Supplement: c2ce25385b.pdf [file c2ce25385b.pdf]

## SUPPLEMENTARY MATERIAL FOR:

### Metallophilic Interactions in Stacked Dinuclear Rhodium 2,2'-biimidazole Carbonyl Complexes

Elina Laurila<sup>a</sup>, Rajendhraprasad Tatikonda<sup>a</sup>, Larisa Oresmaa<sup>a</sup>, Pipsa Hirva<sup>a</sup>, Matti Haukka<sup>\*b</sup>

<sup>a</sup> Department of Chemistry, University of Eastern Finland, Joensuu Campus, P.O. Box 111, FI-80101 Joensuu, Finland.

<sup>\*b</sup> Department of Chemistry, University of Jyväskylä, P.O. Box 35 FI-40014 University of Jyväskylä, Finland

Tel: +358 40 8054666, E-mail: [matti.o.haukka@jyu.fi](mailto:matti.o.haukka@jyu.fi)

#### TABLE OF CONTENT

|                                                                                                                                                                                                                                |    |
|--------------------------------------------------------------------------------------------------------------------------------------------------------------------------------------------------------------------------------|----|
| Reference 24                                                                                                                                                                                                                   | S2 |
| <b>Figure S1.</b> The effect of the intermolecular Rh-Rh distance on the lowest energy absorption band of [Rh <sub>2</sub> (Pr <sub>2</sub> bim)Cl <sub>2</sub> (CO) <sub>4</sub> ] <sub>2</sub> ( <b>3</b> )                  | S2 |
| <b>Table S1.</b> The contribution of the dominating charge transfer and the details of the lowest energy transition for compound <b>2</b> at different intermolecular Rh...Rh distances.                                       | S3 |
| <b>Table S2.</b> The contribution of the dominating charge transfer and the details of the lowest energy transition for compound <b>3</b> at different intermolecular Rh...Rh distances.                                       | S3 |
| <b>Figure S2.</b> Dependence of the HOMO and LUMO orbital energies on the Rh...Rh distance (Å) in the [Rh <sub>2</sub> (Et <sub>2</sub> bim)Cl <sub>2</sub> (CO) <sub>4</sub> ] <sub>2</sub> system.                           | S4 |
| <b>Figure S3.</b> Dependence of the HOMO and LUMO orbital energies on the Rh...Rh distance (Å) in the [Rh <sub>2</sub> (Pr <sub>2</sub> bim)Cl <sub>2</sub> (CO) <sub>4</sub> ] <sub>2</sub> system.                           | S4 |
| <b>Figure S4.</b> The HOMO, LUMO, LUMO+1 and LUMO+2 orbitals of the [Rh <sub>2</sub> (Et <sub>2</sub> bim)Cl <sub>2</sub> (CO) <sub>4</sub> ] <sub>2</sub> system at experimental intermolecular rhodium...rhodium distance    | S5 |
| <b>Figure S5.</b> The HOMO, LUMO, LUMO+1 and LUMO+2 orbitals of the [Rh <sub>2</sub> (Pr <sub>2</sub> bim)Cl <sub>2</sub> (CO) <sub>4</sub> ] <sub>2</sub> system at at experimental intermolecular rhodium...rhodium distance | S6 |
| <b>Figure S6.</b> Thermal ellipsoid plot (50% probability) of the structure of the 1,1'-dipropyl-2,2'-biimidazole ( <b>Pr<sub>2</sub>bim</b> ) -ligand.                                                                        | S7 |

## Reference 24

Frisch, M. J.; Trucks, G. W.; Schlegel, H. B.; Scuseria, G. E.; Robb, M. A.; Cheeseman, J. R.; Montgomery Jr., J. A.; Vreven, T.; Kudin, K. N.; Burant, J. C.; Millam, J. M.; Iyengar, S. S.; Tomasi, J.; Barone, V.; Mennucci, B.; Cossi, M.; Scalmani, G.; Rega, N.; Petersson, G. A.; Nakatsuji, H.; Hada, M.; Ehara, M.; Toyota, K.; Fukuda, R.; Hasegawa, J.; Ishida, M.; Nakajima, T.; Honda, Y.; Kitao, O.; Nakai, H.; Klene, M.; Li, X.; Knox, J. E.; Hratchian, H. P.; Cross, J. B.; Adamo, C.; Jaramillo, J.; Gomperts, R.; Stratmann, R. E.; Yazyev, O.; Austin, A. J.; Cammi, R.; Pomelli, C.; Ochterski, J. W.; Ayala, P. Y.; Morokuma, K.; Voth, G. A.; Salvador, P.; Dannenberg, J. J.; Zakrzewski, V. G.; Dapprich, S.; Daniels, A. D.; Strain, M. C.; Farkas, O.; Malick, D. K.; Rabuck, A. D.; Raghavachari, K.; Foresman, J. B.; Ortiz, J. V.; Cui, Q.; Baboul, A. G.; Clifford, S.; Cioslowski, J.; Stefanov, B. B.; Liu, G.; Liashenko, A.; Piskorz, P.; Komaromi, I.; Martin, R. L.; Fox, D. J.; Keith, T.; Al-Laham, M. A.; Peng, C. Y.; Nanayakkara, A.; Challacombe, M.; Gill, P. M. W.; Johnson, B.; Chen, W.; Wong, M. W.; Gonzalez, C.; Pople, J. A. Gaussian 03, Revision C.02, Gaussian, Inc., Wallingford CT, 2004.

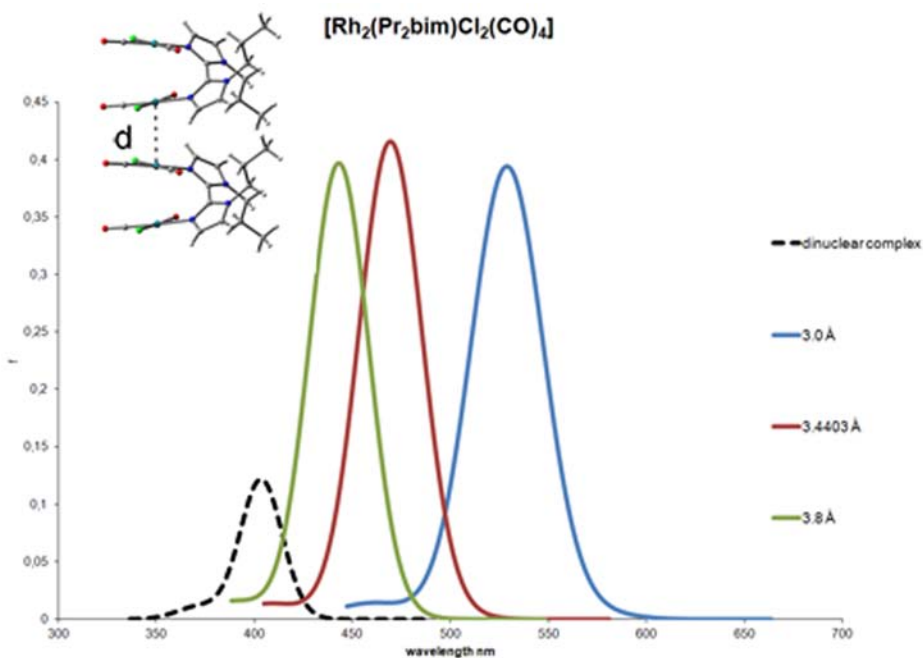

**Figure S1.** The peak shift of the absorption signal corresponding to the different intermolecular Rh...Rh distance ( $d$ ) in the  $[\text{Rh}_2(\text{Pr}_2\text{bim})\text{Cl}_2(\text{CO})_4]_2$  system. The Rh...Rh distance of  $3.4403(3) \text{ \AA}$  is the experimental value.

**Table S1.** The contribution of the dominating charge transfer and the details of the lowest energy transition for compound **2** at different intermolecular Rh...Rh distances.

| Rh...Rh (Å)              | HOMO-LUMO+n % | $\lambda$ (nm) | f      | HOMO-LUMO+n gap (eV) | HOMO (eV) | LUMO (eV) |
|--------------------------|---------------|----------------|--------|----------------------|-----------|-----------|
| Isolated complex*        | 80            | 409            | 0.1062 | 4.23                 | -5.43     | -1.20     |
| 3.0 Å                    | 85            | 543            | 0.3688 | 3.21                 | -4.56     | -1.34     |
| 3.4345. exp <sup>a</sup> | 84            | 479            | 0.4026 | 3.58                 | -4.86     | -1.28     |
| 3.4990. exp <sup>b</sup> | 83            | 464            | 0.4129 | 3.67                 | -4.84     | -1.17     |
| 3.8 Å                    | 80            | 451            | 0.3835 | 3.79                 | -5.03     | -1.24     |

<sup>a</sup> experimental intranuclear distance of Rh...Rh of structure at 100K.

<sup>b</sup> experimental intranuclear distance of Rh...Rh of structure at 260K.

In the chain structures the dominating charge transfer is from HOMO to LUMO+2 at all analysed intermolecular Rh...Rh distances.

\*In the case of isolated dinuclear complex the dominating transition is from HOMO to LUMO+1.

$\lambda$  is the absorption wavelength.

f is the oscillator strength of the transition.

**Table S2.** The contribution of the dominating charge transfer and the details of the lowest energy transition for compound **3** at different intermolecular Rh...Rh distances.

| Rh...Rh (Å)               | HOMO-LUMO+n % | $\lambda$ (nm) | f      | HOMO-LUMO+n gap (eV) | HOMO (eV) | LUMO (eV) |
|---------------------------|---------------|----------------|--------|----------------------|-----------|-----------|
| Isolated complex*         | 84            | 403            | 0.1212 | 4.26                 | -5.36     | -1.10     |
| 3.0 Å                     | 85            | 529            | 0.394  | 3.27                 | -4.48     | -1.21     |
| 3.4403. exp. <sup>a</sup> | 84            | 470            | 0.4156 | 3.63                 | -4.79     | -1.16     |
| 3.4944. exp. <sup>b</sup> | 84            | 459            | 0.4137 | 3.71                 | -4.86     | -1.15     |
| 3.8 Å                     | 80            | 443            | 0.3968 | 3.83                 | -4.95     | -1.12     |

<sup>a</sup> experimental intranuclear distance of Rh...Rh of structure at 100K.

<sup>b</sup> experimental intranuclear distance of Rh...Rh of structure at 260K.

In the chain structures the dominating charge transfer is from HOMO to LUMO+2 at all analysed intermolecular Rh...Rh distances.

\*In the case of isolated dinuclear complex the dominating transition is from HOMO to LUMO+1.

$\lambda$  is the absorption wavelength.

f is the oscillator strength of the transition.

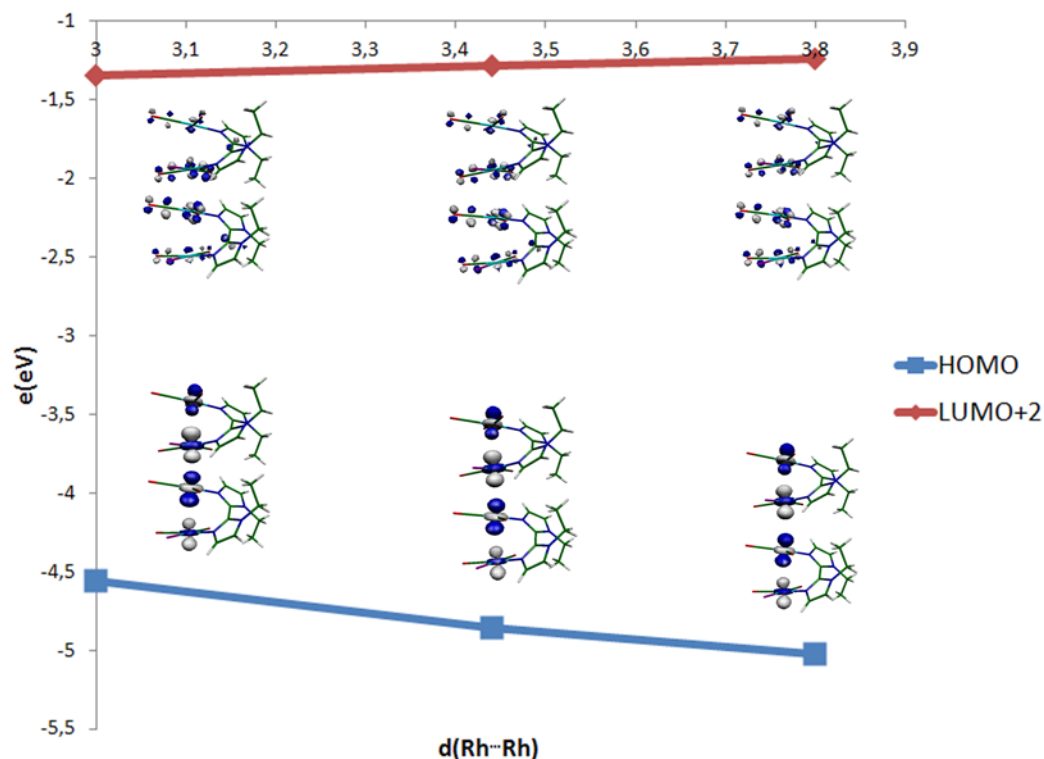

**Figure S2.** Dependence of the HOMO and LUMO orbital energies on the Rh...Rh distance (Å) in the  $[\text{Rh}_2(\text{Et}_2\text{bim})\text{Cl}_2(\text{CO})_4]_2$  system.

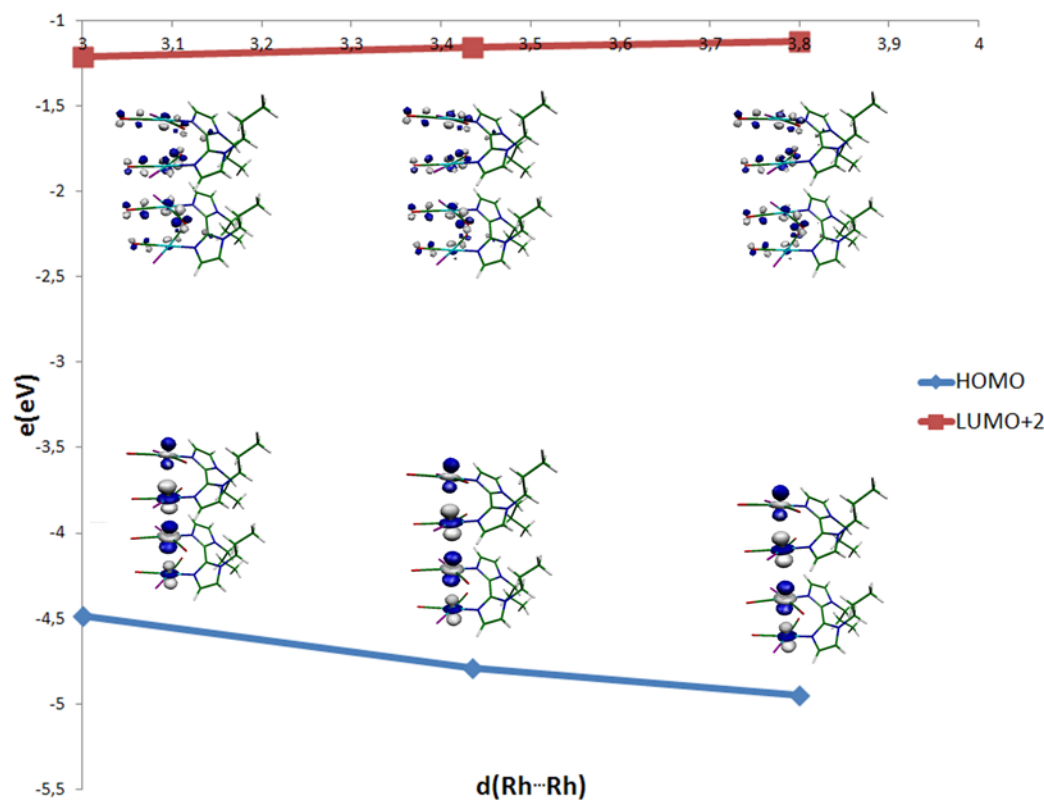

**Figure S3.** Dependence of the HOMO and LUMO orbital energies on the Rh...Rh distance (Å) in the  $[\text{Rh}_2(\text{Pr}_2\text{bim})\text{Cl}_2(\text{CO})_4]_2$  system.

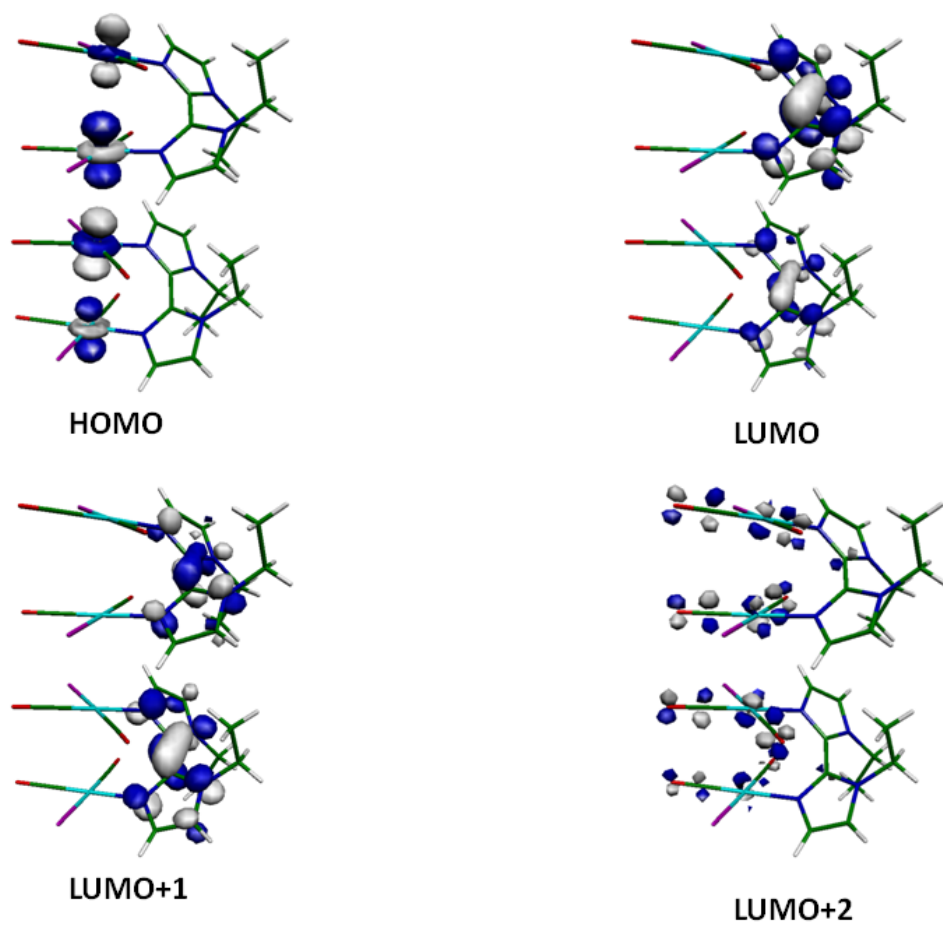

**Figure S4.** The HOMO, LUMO, LUMO+1 and LUMO+2 orbitals of the [Rh<sub>2</sub>(Et<sub>2</sub>bim)Cl<sub>2</sub>(CO)<sub>4</sub>]<sub>2</sub> system at experimental intermolecular rhodium···rhodium distance of 3.4345(6) Å.

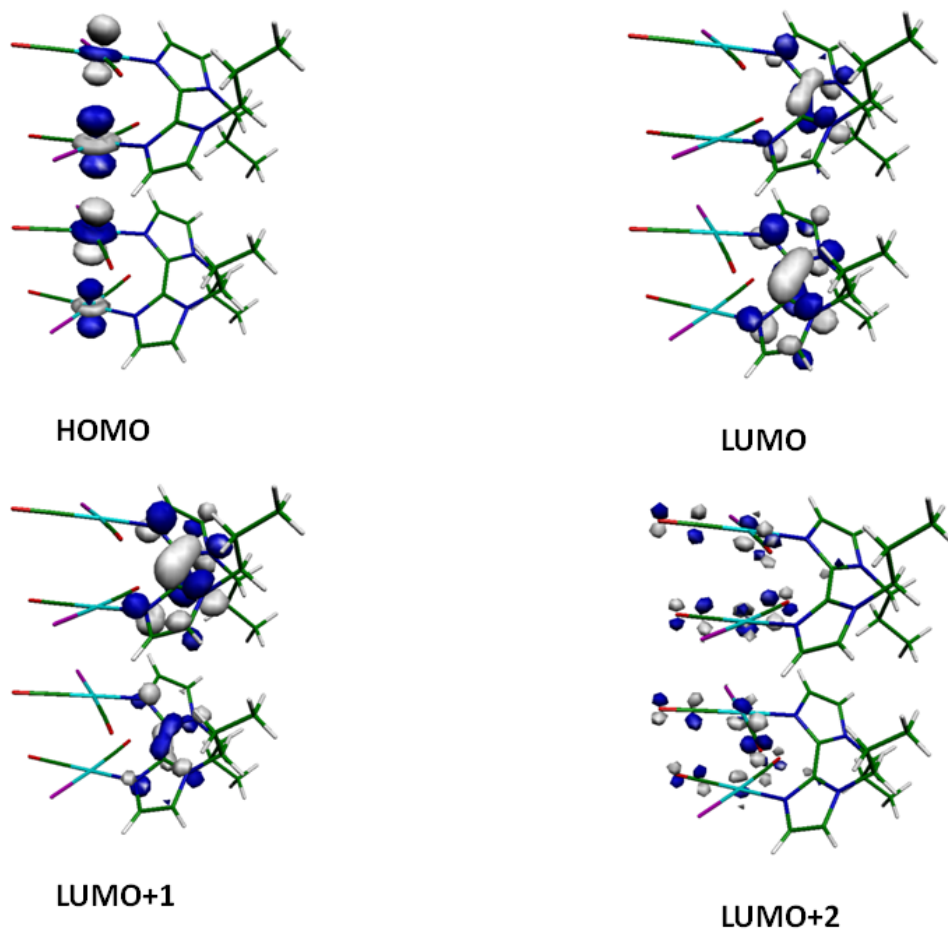

**Figure S5.** The HOMO, LUMO, LUMO+1 and LUMO+2 orbitals of the  $[\text{Rh}_2(\text{Pr}_2\text{bim})\text{Cl}_2(\text{CO})_4]_2$  system at experimental intermolecular rhodium...rhodium distance of 3.4403(3) Å.

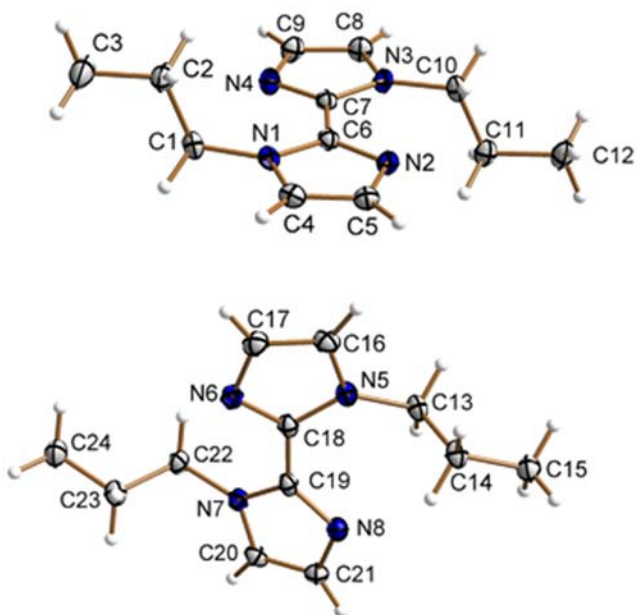

**Figure S6.** Thermal ellipsoid plot (50% probability) of the structure of 1,1'-dipropyl-2,2'-biimidazole (**Pr<sub>2</sub>bim**) -ligand.
